# Supplementary material for: Malaria parasite centrins can assemble by Ca2+-inducible condensation
Source: PubMed Central journal article supplement (PMC10775985; doi:10.1371/journal.ppat.1011899), 2023-12-27
Supplement: ppat.1011899.s016.pdf [file ppat.1011899.s016.pdf]

| #   | Amplicon              | Template                         | Dir. | Sequence                                                       |
|-----|-----------------------|----------------------------------|------|----------------------------------------------------------------|
| P1  | PfCen1                | NF54 cDNA                        | F    | cgaccgggatgtaccATGAGCAGAAAAATCAAAC<br>TATG                     |
| P2  | PfCen1                | NF54 cDNA                        | R    | ttctctcttactcctaggAAATAAGTTGGTCTTTTCAT<br>AATTC                |
| P3  | PfCen2                | NF54 cDNA                        | F    | cgaccgggatgtaccATGACCGATAACACAGCTG                             |
| P4  | PfCen2                | NF54 cDNA                        | R    | ttctctcttactcctaggTAAGAAGCTTTTTTGGTCAT<br>TATTG                |
| P5  | PfCen4                | NF54 cDNA                        | F    | cgaccgggatgtaccATGAACACAATGTTAATTAAG<br>G                      |
| P6  | PfCen4                | NF54 cDNA                        | R    | ttctctcttactcctaggTGAATCTGAATCAACATCAC                         |
| P7  | Halo+Linker           | p238-actin-<br>chromobody-halo*  | F    | gaaaagaccaacttattctcctaggCCAACCACTGAGGATCT<br>GT               |
| P8  | Halo+Linker           | p238-actin-<br>chromobody-halo*  | R    | ccctcgaggaaactcctgcaggtctggacatTTAACCGGAAATC<br>TCCAGAGTAGAC   |
| P9  | PfHsp70 5'<br>UTR     | NF54 gDNA                        | F    | cactatagaatactcgcgccgcCGCATAAATATCTGGTG<br>AAATACAAAC          |
| P10 | PfHsp70 5'<br>UTR     | NF54 gDNA                        | R    | atgtatgctatacgaagtatgaaCCTTTTGCCTAGCCAAT<br>TTTTTC             |
| P11 | hDHFR+GG<br>GS linker | pARL-Cen3-GFP                    | F    | cttctatagcatacattatacgaagtatATGCATGGTTCGCTA<br>AAC             |
| P12 | hDHFR+GG<br>GS linker | pARL-Cen3-GFP                    | R    | aatctattataaataaatggatccacctccaccATCATTCTTCTCA<br>TATACTTC     |
| P13 | hDHFR+GG<br>GS linker | pARL-Cen3-GFP                    | R    | TCTTCTCCCTTAGATACGG                                            |
| P14 | mCherry               | p3xNLS-mCherry-<br>hsp86-BSD     | F    | gaatgatgtggaggtggatccGTATCTAAGGGAGAAGA<br>G                    |
| P15 | mCherry               | p3xNLS-mCherry-<br>hsp86-BSD     | R    | gtataatgtatgctatacgaagtatgctgacttaTGTAGAGTGTCT<br>ACCTTC       |
| P16 | GFP                   | pARL-Cen3-GFP                    | F    | gtatagcatacattatacgaagtatacgcgtATGGTTAGTAAAG<br>GAGAAGAACTTTTC |
| P17 | GFP                   | pARL-Cen3-GFP                    | R    | ctattataaataaatgctcgagTTATTTGTATAGTTCATCC<br>ATG               |
| P18 | PbDHFR<br>3'UTR       | PbANKA gDNA                      | F    | gtagacactctacataagtcgacGATATGGCAGCTTAATGT<br>TC                |
| P19 | PbDHFR<br>3'UTR       | PbANKA gDNA                      | R    | atgctatacgaagtat G ATATCGAAATTGAAGG                            |
| P20 | PfHsp86<br>5'UTR      | NF54 gDNA                        | F    | cactatagaatactcgcgccgcGGGAATTCCTTATAAGA<br>TCTTTC              |
| P21 | PfHsp86<br>5'UTR      | NF54 gDNA                        | R    | atgtatgctatacgaagtATTTTATTCGAAATGTGGGAA<br>G                   |
| P22 | Cen1                  | pARL-Cen1-GFP                    | F    | acattatacgaagtatacgcgtATGAGCAGAAAAATCAA<br>AC                  |
| P23 | ΔN-PfCen1             | pARL-Cen1-GFP                    | F    | acattatacgaagtatacgcgtATGGAATTAATGAAGAA<br>CAAAAATTAG          |
| P24 | GFP-T2A               | pSLI-TGD_PfSlp-GFP <sub>42</sub> | F    | acattatacgaagtatacgcgtATGAGTAAAGGAGAAGAA<br>CTTTTC             |
| P25 | GFP-T2A               | pSLI-TGD_PfSlp-GFP <sub>42</sub> | R    | agtttgatttttctgctTGGTCTGGATTTTCTTCTAC                          |
| P26 | PfCen1                | pFIO+ PfCen1-GFP                 | F    | AGCAGAAAAAATCAAACCTATG                                         |
| P27 | PfCen1                | pFIO+ PfCen1-GFP                 | R    | Ctattataaataaatgctcgag TTA<br>AAATAAGTTGGTCTTTTTTCATAATTC      |
| P28 | HsCen2                | human cDNA                       | F    | actttaagaaggagatataccATGGCTCCAACCTTAAGA<br>AGG                 |
| P29 | HsCen2                | human cDNA                       | R    | agtgggtgggtgggtgggtgccATAGAGGCTGGTCTTTTT<br>CATG               |
| P30 | PfCen1 (E.<br>coli)   | oligo 6                          | F    | actttaagaaggagatataccATGTCTCGTAAAAACCAAA<br>CC                 |
| P31 | PfCen1 (E.<br>coli)   | oligo 6                          | R    | agtgggtgggtgggtgggtgccGAATAAGTTAGTTTTTTTT<br>ATAATGCG          |

|     |                             |               |   |                                                |
|-----|-----------------------------|---------------|---|------------------------------------------------|
| P32 | $\Delta$ N-PfCen1 (E. coli) | oligo 6       | F | ttaagaaggagatataccatgGAGCTGAATGAGGAACAA AAG    |
| P33 | PfCen1 (E. coli)            | oligo 6       | R | ttctcctttactcctaggGAATAAGTTAGTTTTTTTCATA ATGCG |
| P34 | PfCen2 (E. coli)            | oligo 7       | F | actttaagaaggagatataccATGACAGATAAACTGCC         |
| P35 | PfCen2 (E. coli)            | oligo 7       | R | agtgggtggtggtggtggtgcccCAGGAACTTTTCTTGGT C     |
| P36 | GFP                         | pARL-Cen3-GFP | F | CCTAGGAGTAAAGGAGAAGAAC                         |
| P37 | GFP                         | pARL-Cen3-GFP | R | agtgggtggtggtggtggtgcccTTTGTATAGTTCATCCATG CC  |
| P38 | PfCen3 (E. coli)            | oligo 8       | F | ttaagaggagaaagatccATGATTAACCGTAAGAGC           |
| P39 | PfCen3 (E. coli)            | oligo 8       | R | gtggtgatgatggtgATATAAGGATGTCTGCTTC             |
| P40 | PfCen4 (E. coli)            | oligo 9       | F | ttaagaggagaaagatccATGAATACTATGCTGATCA AAG      |
| P41 | PfCen4 (E. coli)            | oligo 9       | R | gtggtgatgatggtgAGAGTCGCTGTCAACGTC              |
| P42 | PfCen1 (E. coli)            | oligo 6       | F | aacctgtatttcagggcATGTCTCGTAAAAACCAAACC         |
| P43 | PfCen2 (E. coli)            | oligo 7       | F | aacctgtatttcagggcATGACAGATAAACTGCC             |
| P44 | PfCen3 (E. coli)            | oligo 8       | F | aacctgtatttcagggcATGATTAACCGTAAGAGCG           |
| P45 | PfCen4 (E. coli)            | oligo 9       | F | aacctgtatttcagggcATGAATACTATGCTGATCAAA G       |
| P46 | pZE13d ORF                  |               | R | CAGCTAATTAAGCTTGGCTGCAG                        |

**S1 Table. Primers used in this study.** All primers used for amplification of the various construct fragments used for molecular cloning as described above are listed here. Homology regions for Gibson Assembly are in lowercase, PCR binding sequences are capitalized. \* Kindly provided by Dr. Friedrich Frischknecht.
