# Supplementary material for: Malaria parasite centrins can assemble by Ca2+-inducible condensation
Source: PubMed Central journal article supplement (PMC10775985; doi:10.1371/journal.ppat.1011899), 2023-12-27
Supplement: ppat.1011899.s018.pdf [file ppat.1011899.s018.pdf]

| Antibody                               | Species | Dilution              | Source                      |
|----------------------------------------|---------|-----------------------|-----------------------------|
| Anti-alpha-tubulin B-5-1-2, monoclonal | mouse   | 1:500                 | Sigma-Aldrich (T5168)       |
| Anti-PfCentrin3, polyclonal            | rabbit  | 1:500                 | Simon et al. 2021           |
| Anti-PfCentrin1, polyclonal            | rat     | 1:500<br>WB<br>1:1000 | This study                  |
| Anti-PfAldolase                        | Rabbit  | WB<br>1:1000          | Abcam (ab207494)            |
| Anti-GFP, ABfinity Monoclonal          | rabbit  | 1:50                  | Thermo Fisher (G10362)      |
| Anti-GFP                               | mouse   | WB<br>1:1000          | Roche (11814460001)         |
| Anti-mouse-Atto 594                    | goat    | 1:1000                | Sigma-Aldrich (76085-1ML-F) |
| Anti-mouse-Atto 647                    | goat    | 1:1000*               | Sigma-Aldrich (50185-1ML-F) |
| Anti-rabbit-Atto 594                   | goat    | 1:1000*               | Sigma-Aldrich (77671-1ML-F) |
| Anti-rat-Atto 594                      | goat    | 1:1000*               | Rockland (ROCK612-155-120S) |
| GFP-Booster_Atto 488                   | -       | 1:200                 | Chromotek (gba488-100)      |
| Anti-mouse-800                         | donkey  | WB<br>1:10000         | Rockland (610-745-002)      |
| Anti-rabbit-680                        | donkey  | WB<br>1:10000         | Rockland (610-744-002)      |
| Anti-rat-800                           | donkey  | WB<br>1:10000         | Rockland (612-145-002)      |

**S3 Table. Antibodies used in this study.** List of antibodies with information of species, final dilution and source with order number. Starred (\*) are dilutions for confocal IFAs. For STED microscopy concentration was increased to 1:200.
